# Supplementary material for: Metabolic Syndrome and Its Associated Early-Life Factors among Chinese and Spanish Adolescents: A Pilot Study
Source: PubMed Central journal article supplement (PMC6682950; doi:10.3390/nu11071568), 2019-07-11
Supplement: nutrients-11-01568-s001.pdf [file nutrients-11-01568-s001.pdf]

Supplementary Table S1. Risk of MetS features based on associated factors from multivariable logistic regression (categorical variables).

| <b>Categorical Variables (reference)</b> | <b>N</b> | <b>MetS</b>               |
|------------------------------------------|----------|---------------------------|
|                                          |          | <b>OR(95%CI)</b>          |
| Age                                      |          | 1.01 (0.80,1.29)          |
| Gender (Boy)                             | 1011     | 1.48 (0.69,3.19)          |
| Country (China)                          | 1150     | <b>14.52 (5.53,38.13)</b> |
| Breastfeeding duration ( $\leq 6$ month) | 732      | <b>0.50 (0.20,0.89)</b>   |
| Birth weight (normal weight)             | 1720     |                           |
| High birth weight                        | 193      | 1.24 (0.46,3.36)          |
| Low birth weight                         | 89       | NA                        |
